# Supplementary material for: Ehlers-Danlos: A Literature Review and Case Report in a Colombian Woman with Multiple Comorbidities
Source: MDPI journal article supplement (doi:10.3390/genes13112118), 2022-11-15
Supplement: s1 [file s1]

|                                                                               | ullrich muscular dystrophy | bethlem myopathy | Myopathic Ehlers Danlos syndrome | Patient               |
|-------------------------------------------------------------------------------|----------------------------|------------------|----------------------------------|-----------------------|
| Muscle weakness                                                               | yes                        | -                | yes                              | yes                   |
| Proximal joint retractions                                                    | yes                        | yes              | yes                              | yes                   |
| Hyperflexity of distal joints                                                 | yes                        | -                | yes                              | yes                   |
| Slow progression of the disease                                               | yes                        | yes              | -                                | -                     |
| kyphosis                                                                      | yes                        | -                | escoliosis                       | yes                   |
| Skin abnormalities (follicular hyperkeratosis, keloid formation, velvet skin) | yes                        | yes              | Yes, but other type of EDS       | Yes, keloid formation |
| Ogival palate                                                                 | yes                        | -                | rare                             | yes                   |
| Difficulty for raising arms, exercising, climbing stairs                      | -                          | yes              | -                                |                       |
| Hyperflexity of skin                                                          | -                          | -                | yes                              | yes                   |
| Permanent muscle tension (contractures)                                       | -                          | -                | yes                              | yes                   |
| Delay in motor development                                                    | -                          | -                | yes                              | -                     |

Supplementary Table S1. Differential diagnosis of congenital myopathies. (-) data not available.

| Chr | Ref | Alt | Gene    | dbSNP       | 1000G ALL  | 1000G AMR | ExAC Freq | ExAC European (non-Finnish) | ESP 6500si ALL | gnomAD exome ALL | gnomAD exome European (non-Finnish) | III:7 |
|-----|-----|-----|---------|-------------|------------|-----------|-----------|-----------------------------|----------------|------------------|-------------------------------------|-------|
| 6   | C   | T   | COL12A1 | rs201988277 | 0.00019968 | 0.001     | 0.00029   | 0.000431                    | 0,0003         | 0.0003856        | 0.0004317                           | CT    |

Supplementary Table S2. Allelic frequencies of candidate variants under the prioritization criteria identified with the ANNOVAR tool. **Chr**: Chromosome. **Ref**: Reference allele. **Alt**: Alternate allele. **Gene**: Gene name. **dbSNP**: Variant identifier in dbSNP database. **1000GALL**: Allele frequency in 1000 genomes data base (all populations). **1000GAMR**: Allele frequency in 1000 genomes data base (Amerindian population). **ExACFreq**: Allele frequency in ExAC 65000 data base (all populations). **ExACAMR**: Allele frequency in ExAC 65000 data base (Amerindian population). **ESP6500siALL**: Allele frequency in NCBI-ESP 6500 database (all populations). **gnomADexomeALL**: Allele frequency in gnomAD database, exome data (all populations). **gnomADexomeAMR**: Allele frequency in gnomAD database, exome data (Amerindian population). **gnomADgenomeALL**: Allele frequency in gnomAD database, genome data (all populations). **gnomADgenomeAMR**: Allele frequency in gnomAD database, genome data (Amerindian population).

| Chr | Ref | Alt | Gene    | dbSNP       | Geno Canyon | fitCons | GERP++RS | phyloP vertebrate | phyloP mammalian | phastCons vertebrate | phastCons mammalian | SiPhy | III:7 |
|-----|-----|-----|---------|-------------|-------------|---------|----------|-------------------|------------------|----------------------|---------------------|-------|-------|
| 6   | C   | T   | COL12A1 | rs201988277 | 1           | 0,706   | 5,84     | 6,217             | 0,951            | 1                    | 0,969               | 11,11 | CT    |

Supplementary Table S3. Results of evolutionary conservation predictors of candidate variants under the prioritization criteria identified with the ANNOVAR tool. **Chr**: Chromosome. **Ref**: Reference allele. **Alt**: Alternate allele. **Gene**: Gene name. **dbSNP**: Variant identifier in dbSNP database. Evolutionary conservation predictors scores. **GenoCanyon**: Conservation scores with GenoCanyons tool (Conserved region=scores~1). **fitCons**: Conservation scores with fitCons tool: (Conserved region= ~1). **GERP++RS**: Conservation scores with GERP++RS tool (Conservation region=scores>4.4) **phyloPvertebrate**: Conservation scores with phyloP100 tool for vertebrates (Conservation region=scores>1.6). **phyloPmammalian**: Conservation scores with phyloP100 tool for mammalian (Conservation region=scores>1.6). **phastConsvertebrate**: Conservation scores with phastCons tool for vertebrates (Conservation region= scores~1). **phastConsmammalian**: Conservation scores with phastCons tool for vertebrates (Conservation region= scores~1) **SiPhy**: Conservation scores with SiPhy tool (Conservation region=scores >12.17).

| Chr | Gene    | dbSNP       | SIFT | Poly phen2 HDIV | Poly phen2 HVAR | LRT | Mutation Taster | Mutation Assessor | FATHMM | PROVEAN | VEST3 | Meta SVM | Meta LR | M-CAP | CADD | DANN score | Fathmm MKL | III:7 |
|-----|---------|-------------|------|-----------------|-----------------|-----|-----------------|-------------------|--------|---------|-------|----------|---------|-------|------|------------|------------|-------|
| 6   | COL12A1 | rs201988277 | D    | D               | P               | D   | D               | M                 | T      | D       | 0,263 | T        | T       | T     | 25,2 | 0,999      | D          | CT    |

Supplementary Table S4. Pathogenicity predictors results of candidate variants under the prioritization criteria identified with the ANNOVAR tool. **Chr**: Chromosome.

**Gene**: Gene name. **dbSNP**: Variant identifier in dbSNP database. Pathogenicity predictors scores. **SIFT**: Pathogenicity prediction with SIFT tool: D=Deleterious, T=Tolerated). **Polyphen2HDIV**: Pathogenicity prediction with PolyPhen2 tool for Mendelian disease variants (D=Damaging, P=Possibly Damaging, B=Benign, U=Unknown). **Polyphen2HVAR**: Pathogenicity prediction with PolyPhen2 tool for all human disease-causing mutations (D=Damaging, P=Possibly Damaging, B=Benign, U= Unknown). **LRT**: Pathogenicity prediction with LTR tool (D=Deleterious, N=No Deleterious). **MutationTaster**: Pathogenicity prediction with Mutation Tester tool (A=Disease causing automatic, D=Disease causing, N=Polymorphism, P= Polymorphism automatic). **MutationAssessor**: Pathogenicity prediction with Mutation Assessor tool (N= Neutral effect, L=Low effect, M=Medium effect, H=High effect). **FATHMM**: Pathogenicity prediction with FATHMM tool (D=Deleterious, T=Tolerated). **PROVEAN**: Pathogenicity prediction with PROVEAN tool (D=Deleterious, N=No Deleterious). **VEST3**: Pathogenicity SCORES with VEST tool (Deleterious=scores>0.63). **MetaSVM**: Pathogenicity prediction with MetaSVM tool (D=Damaging, T=Tolerated). **MetaLR**: Pathogenicity prediction with MetaLR tool (D=Damaging, T=Tolerated). **M-CAP**: Pathogenicity prediction with M-CAP tool (D=Damaging, B=Benign). **CADD**: Pathogenicity scores with CADD tool (Deleterious=scores>14). **DANN**: Pathogenicity prediction with DANN tool (Pathogenic= scores~1). **FathmmMKL**: Pathogenicity prediction with FathmmMKL tool (D=Deleterious, T=Tolerated).

| Chr | Gene    | Change       | dbSNP       | 22 1 F1I II:7 | Varsome                                | Intervar                                       | Clinvar                |
|-----|---------|--------------|-------------|---------------|----------------------------------------|------------------------------------------------|------------------------|
| 6   | COL12A1 | p.Thr2618Met | rs201988277 | CT            | PM2, PP2, PP3 (uncertain significance) | PM1, PM2, PP5 and BS2 (uncertain significance) | Uncertain significance |

Supplementary Table S5. Clinical interpretation of the candidate variants identified in the exome analysis in a proband with congenital myopathy. **Chr**:

Chromosome. **Gene**: Name of the gene. **Change**: Nucleotide/amino acid change. **dbSNP**: Identifier of the variant in the dbSNP database. **Varsome**: Classification of variants according to the Varsome platform. **Intervar**: Classification of the variants according to the Intervar platform. **PM1**: Located in a mutational hot spot and/or critical and well-established functional domain (e.g., active site of an enzyme) without benign variation. **PM2**: Absent from controls (or at extremely low frequency if recessive) in Exome Sequencing Project, 1000 Genomes Project, or Exome Aggregation Consortium. **PP2**: Missense variant in a gene that has a low rate of benign missense variation and in which missense variants are a common mechanism of disease. **PP3**: Multiple lines of computational evidence support a deleterious effect on the gene or gene product (conservation, evolutionary, splicing impact, etc.). **PP5**: Reputable source recently reports variant as pathogenic, but the evidence is not available to the laboratory to perform an independent evaluation. **BS2**: Observed in a healthy adult individual for a recessive (homozygous), dominant (heterozygous), or X-linked (hemizygous) disorder, with full penetrance expected at an early age.
